# Supplementary material for: Comparative efficacy and safety of multimodality treatment for advanced hepatocellular carcinoma with portal vein tumor thrombus: patient-level network meta-analysis
Source: PubMed Central journal article supplement (PMC10905023; doi:10.3389/fonc.2024.1344798), 2024-02-16
Supplement: DataSheet_1.pdf [file DataSheet_1.pdf]

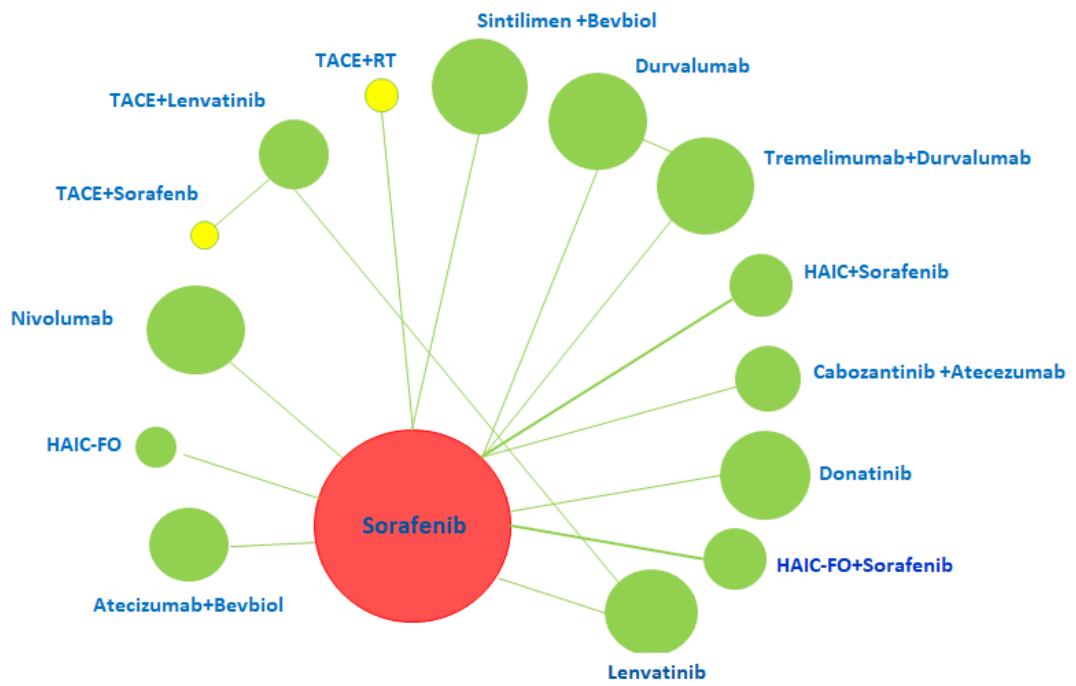

Supplementary Figure 1. Network map of randomized controlled trials comparing multimodality treatment for aHCC with PVTT

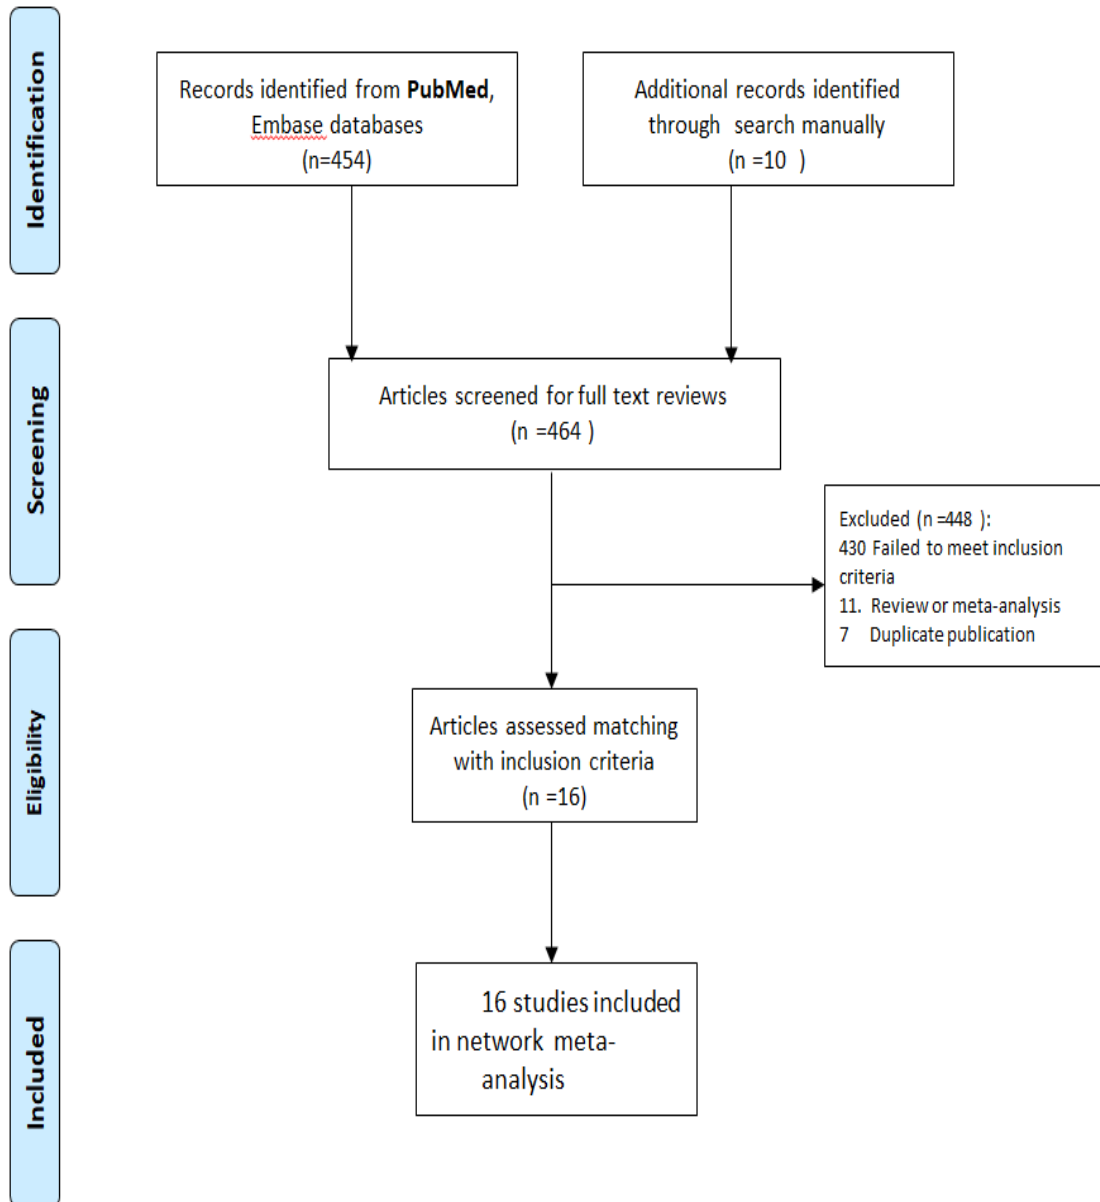

Supplementary Figure 2 The flow chart summarizing the process for the identification of the eligible clinical studies

(A)

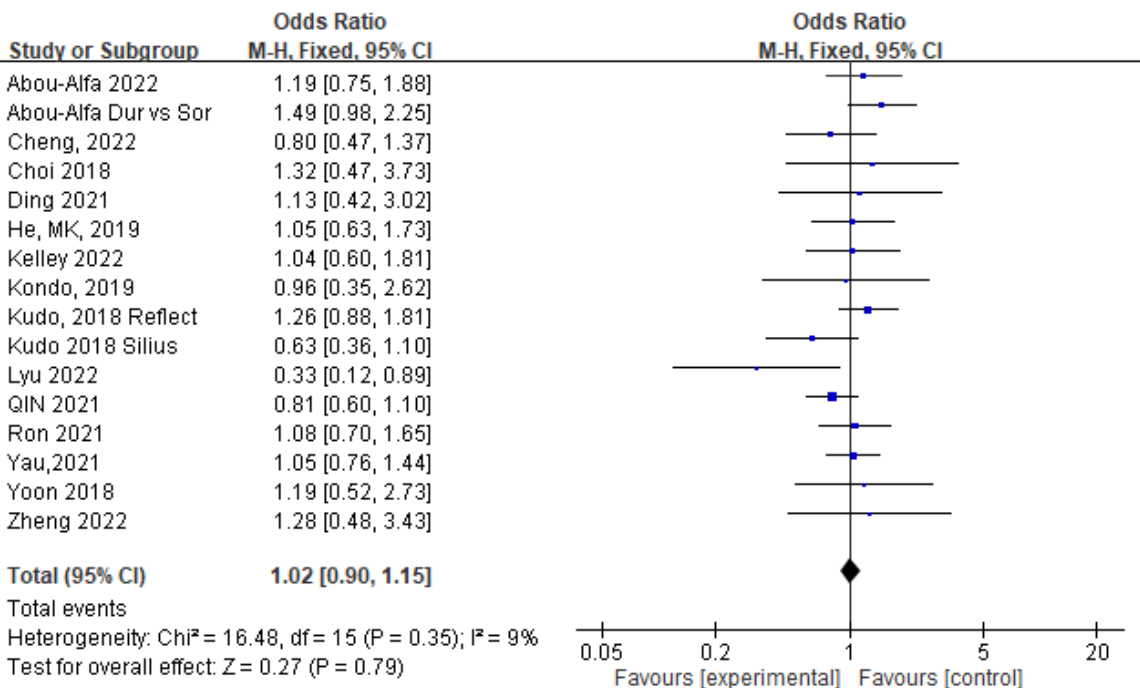

(B)

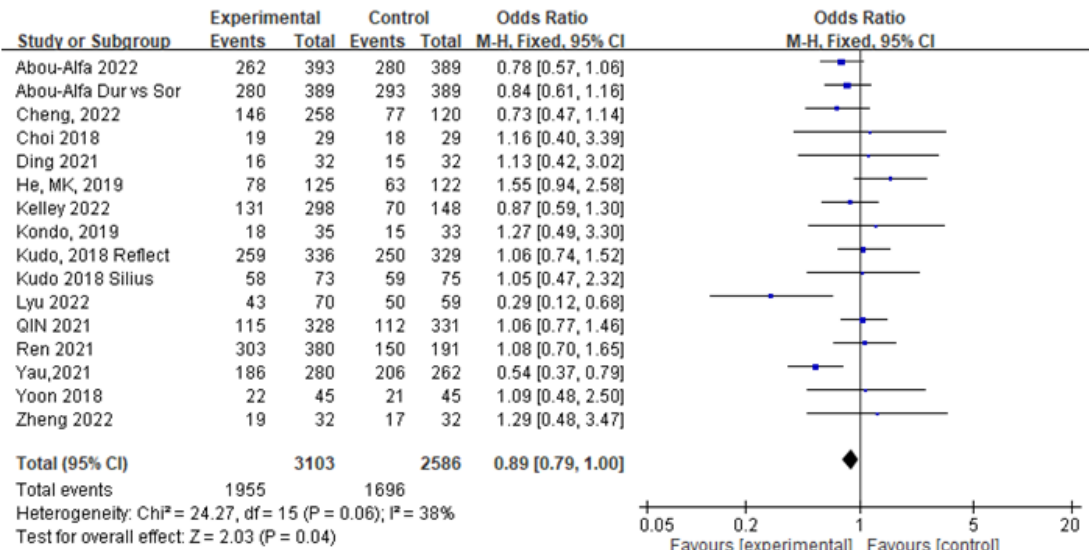

Supplementary Figure 3.  $I^2$  test for heterogeneity in direct comparison of regimens (A) overall survival (B) progress free survival in this network analysis

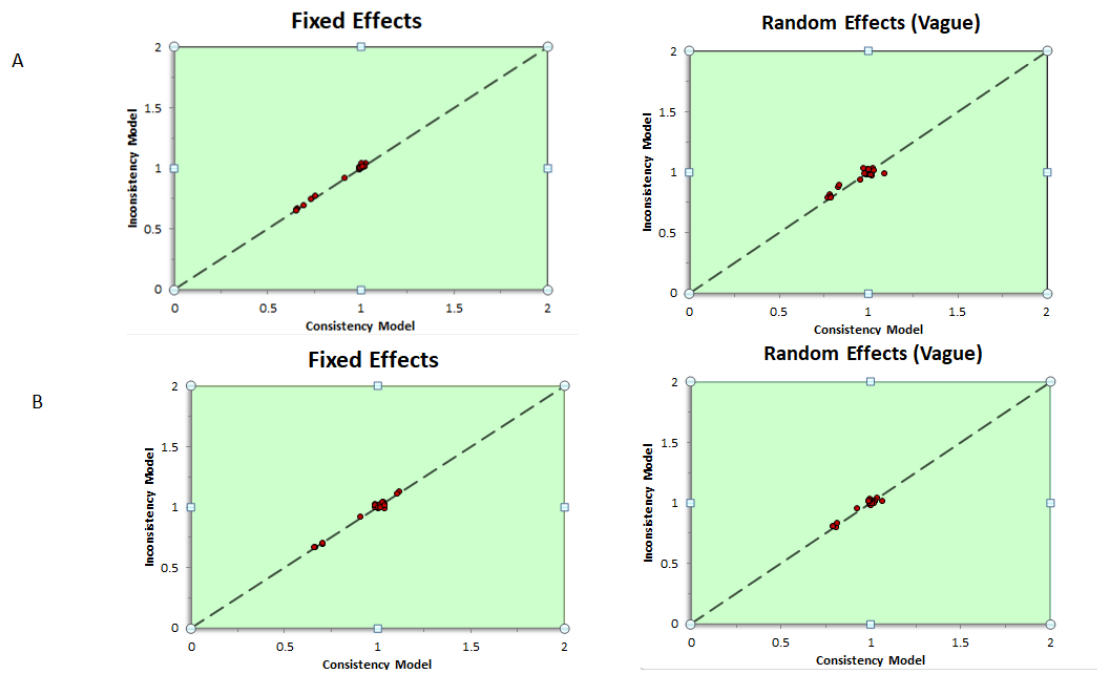

Supplementary Figure 4. Inconsistency vs consistency plot for (A) Overall survival (B) Progression free survival of multimodality treatments. Plot of individual data points for the consistency model (horizontal axis) and the inconsistency model (vertical axis), along with the equality line.

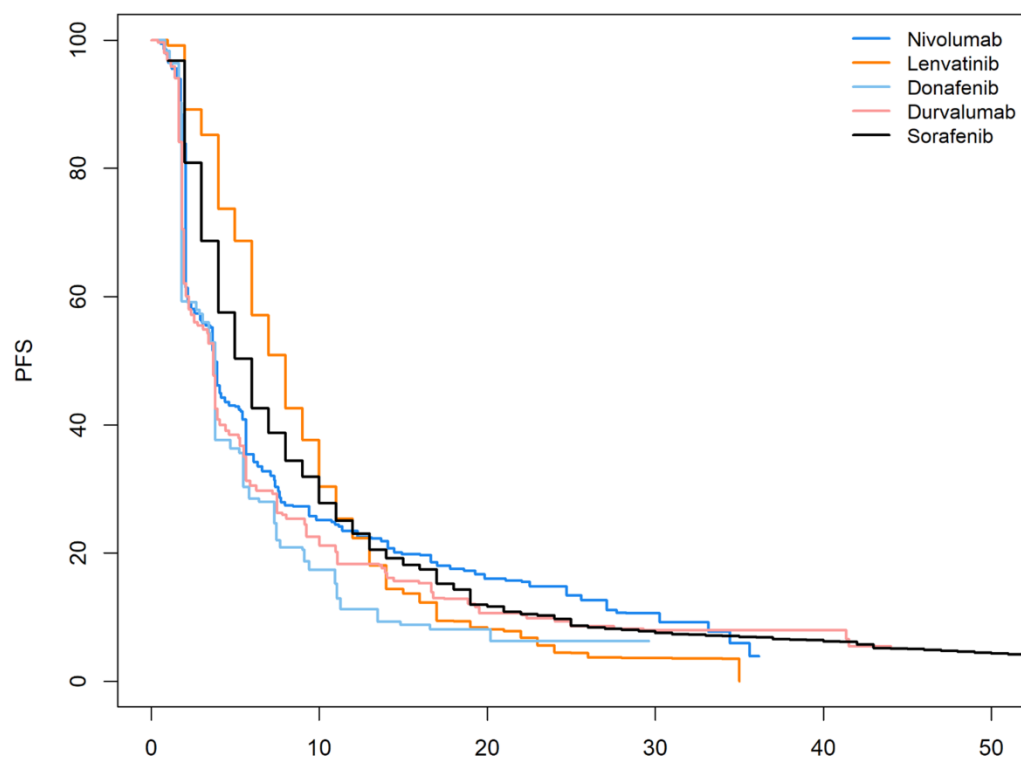

| Number at risk | Time (months) |     |     |     |     |    |
|----------------|---------------|-----|-----|-----|-----|----|
|                | 0             | 10  | 20  | 30  | 40  | 50 |
| Nivolumab      | 371           | 84  | 40  | 11  | 0   | 0  |
| Lenvatinib     | 478           | 158 | 29  | 4   | 0   | 0  |
| Donafenib      | 328           | 29  | 7   | 0   | 0   | 0  |
| Durvalumab     | 393           | 91  | 46  | 26  | 1   | 0  |
| Sorafenib      | 2699          | 946 | 409 | 201 | 122 | 47 |

Supplementary Figure 5. Kaplan-Meier curves for PFS for monotherapy regimens

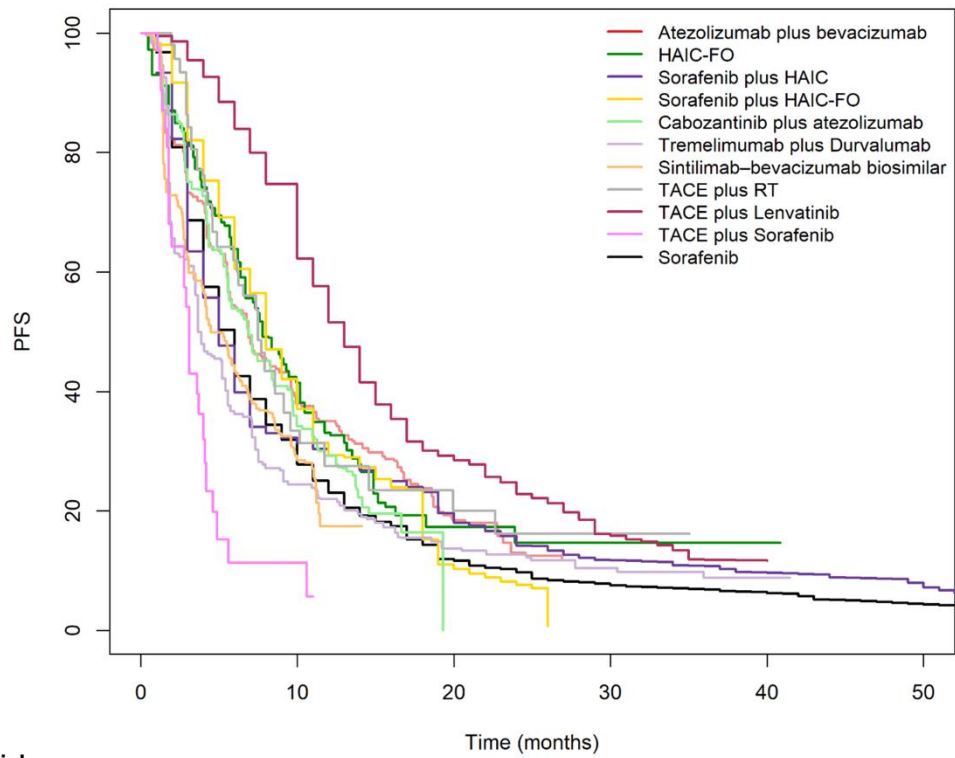

|                                   | Time (months) |     |     |     |     |    |
|-----------------------------------|---------------|-----|-----|-----|-----|----|
| Number at risk                    | 0             | 10  | 20  | 30  | 40  | 50 |
| Atezolizumab plus bevacizumab     | 165           | 113 | 41  | 0   | 0   | 0  |
| HAIC-FO                           | 130           | 49  | 17  | 6   | 1   | 0  |
| Sorafenib plus HAIC               | 150           | 81  | 44  | 22  | 10  | 2  |
| Sorafenib plus HAIC-FO            | 157           | 49  | 22  | 0   | 0   | 0  |
| Cabozantinib plus atezolizumab    | 250           | 66  | 0   | 0   | 0   | 0  |
| Tremelimumab plus Durvalumab      | 389           | 88  | 38  | 20  | 5   | 0  |
| Sintilimab-bevacizumab biosimilar | 380           | 37  | 0   | 0   | 0   | 0  |
| TACE plus RT                      | 45            | 27  | 5   | 1   | 0   | 0  |
| TACE plus Lenvatinib              | 202           | 137 | 42  | 11  | 0   | 0  |
| TACE plus Sorafenib               | 32            | 2   | 0   | 0   | 0   | 0  |
| Sorafenib                         | 2699          | 946 | 409 | 201 | 122 | 47 |

Supplementary Figure 6. Kaplan-Meier curves for PFS for combination regimens

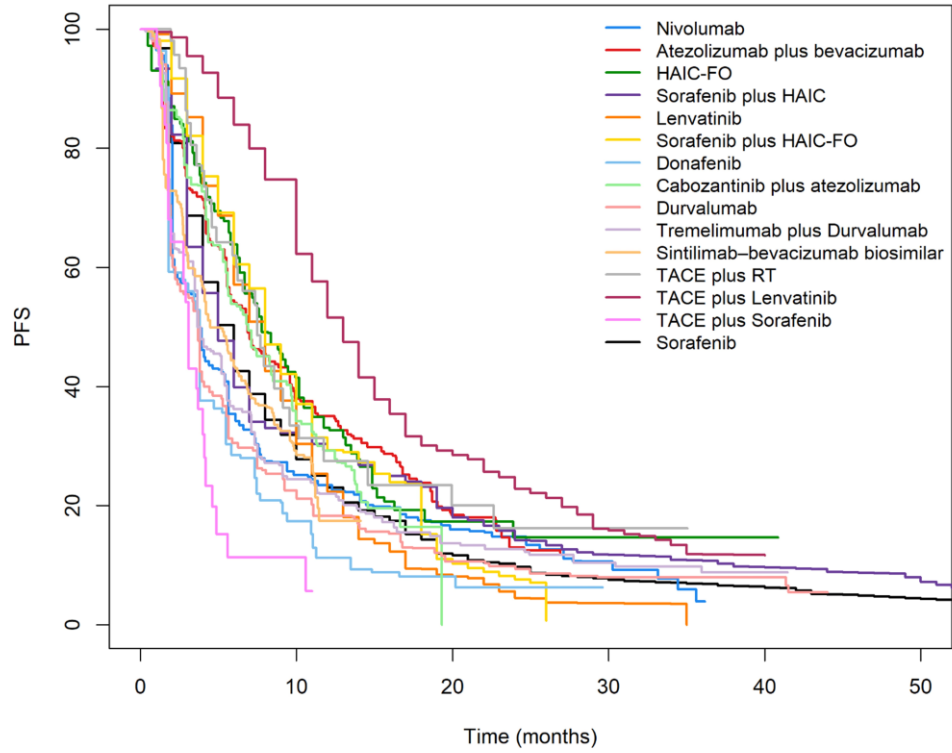

**Number at risk**

|                                   |      |     |     |     |     |    |
|-----------------------------------|------|-----|-----|-----|-----|----|
| Nivolumab                         | 371  | 84  | 40  | 11  | 0   | 0  |
| Atezolizumab plus bevacizumab     | 165  | 113 | 41  | 0   | 0   | 0  |
| HAIC-FO                           | 130  | 49  | 17  | 6   | 1   | 0  |
| Sorafenib plus HAIC               | 150  | 81  | 44  | 22  | 10  | 2  |
| Lenvatinib                        | 478  | 158 | 29  | 4   | 0   | 0  |
| Sorafenib plus HAIC-FO            | 157  | 49  | 22  | 0   | 0   | 0  |
| Donafenib                         | 328  | 29  | 7   | 0   | 0   | 0  |
| Cabozantinib plus atezolizumab    | 250  | 66  | 0   | 0   | 0   | 0  |
| Durvalumab                        | 393  | 91  | 46  | 26  | 1   | 0  |
| Tremelimumab plus Durvalumab      | 389  | 88  | 38  | 20  | 5   | 0  |
| Sintilimab-bevacizumab biosimilar | 380  | 37  | 0   | 0   | 0   | 0  |
| TACE plus RT                      | 45   | 27  | 5   | 1   | 0   | 0  |
| TACE plus Lenvatinib              | 202  | 137 | 42  | 11  | 0   | 0  |
| TACE plus Sorafenib               | 32   | 2   | 0   | 0   | 0   | 0  |
| Sorafenib                         | 2699 | 946 | 409 | 201 | 122 | 47 |

Supplementary Figure 7. Kaplan-Meier curves for progression-free survival for all multimodality regimens

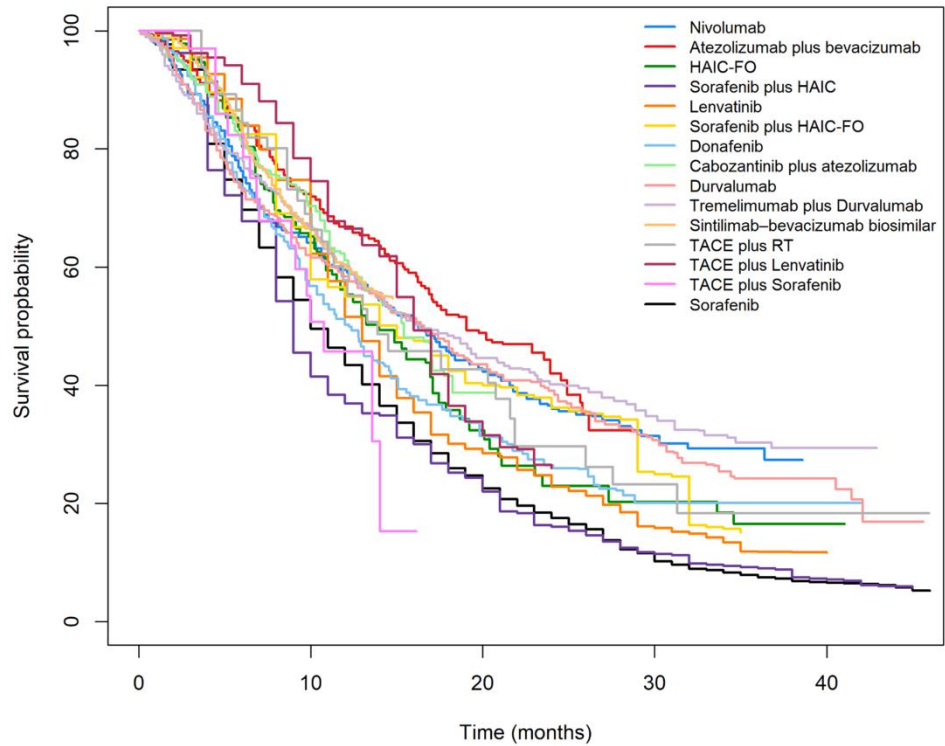

**Number at risk**

|                                   |      |      |     |    |   |
|-----------------------------------|------|------|-----|----|---|
| Nivolumab                         | 371  | 216  | 147 | 63 | 0 |
| Atezolizumab plus bevacizumab     | 336  | 233  | 134 | 0  | 0 |
| HAIC-FO                           | 130  | 76   | 31  | 10 | 0 |
| Sorafenib plus HAIC               | 166  | 87   | 48  | 22 | 3 |
| Lenvatinib                        | 646  | 443  | 138 | 41 | 0 |
| Sorafenib plus HAIC-FO            | 157  | 77   | 28  | 3  | 0 |
| Donafenib                         | 328  | 188  | 95  | 25 | 2 |
| Cabozantinib plus atezolizumab    | 432  | 208  | 0   | 0  | 0 |
| Durvalumab                        | 389  | 256  | 161 | 87 | 8 |
| Tremelimumab plus Durvalumab      | 389  | 71   | 35  | 20 | 1 |
| Sintilimab-bevacizumab biosimilar | 380  | 126  | 0   | 0  | 0 |
| TACE plus RT                      | 45   | 30   | 18  | 6  | 2 |
| TACE plus Lenvatinib              | 202  | 121  | 23  | 0  | 0 |
| TACE plus Sorafenib               | 32   | 12   | 0   | 0  | 0 |
| Sorafenib                         | 2637 | 1339 | 446 | 66 | 0 |

Supplementary Figure 8. Kaplan-Meier curves for overall survival for all multimodality regimens



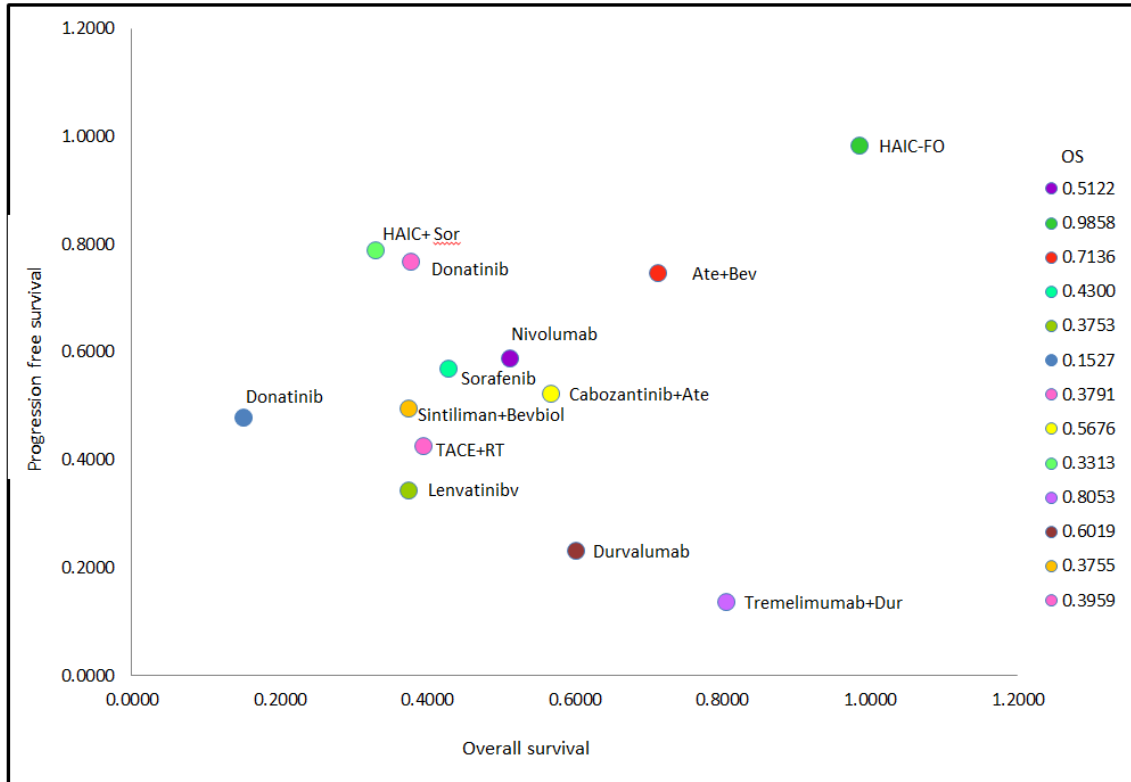

Supplementary Figure 9. SUCRA ranking probabilities of regimens for PFS and OS. Abbreviations: HAIC (hepatic arterial infusion chemotherapy)

**Treatment 1 vs. Treatment 2**

**O.R. (95% Cr.I.)**

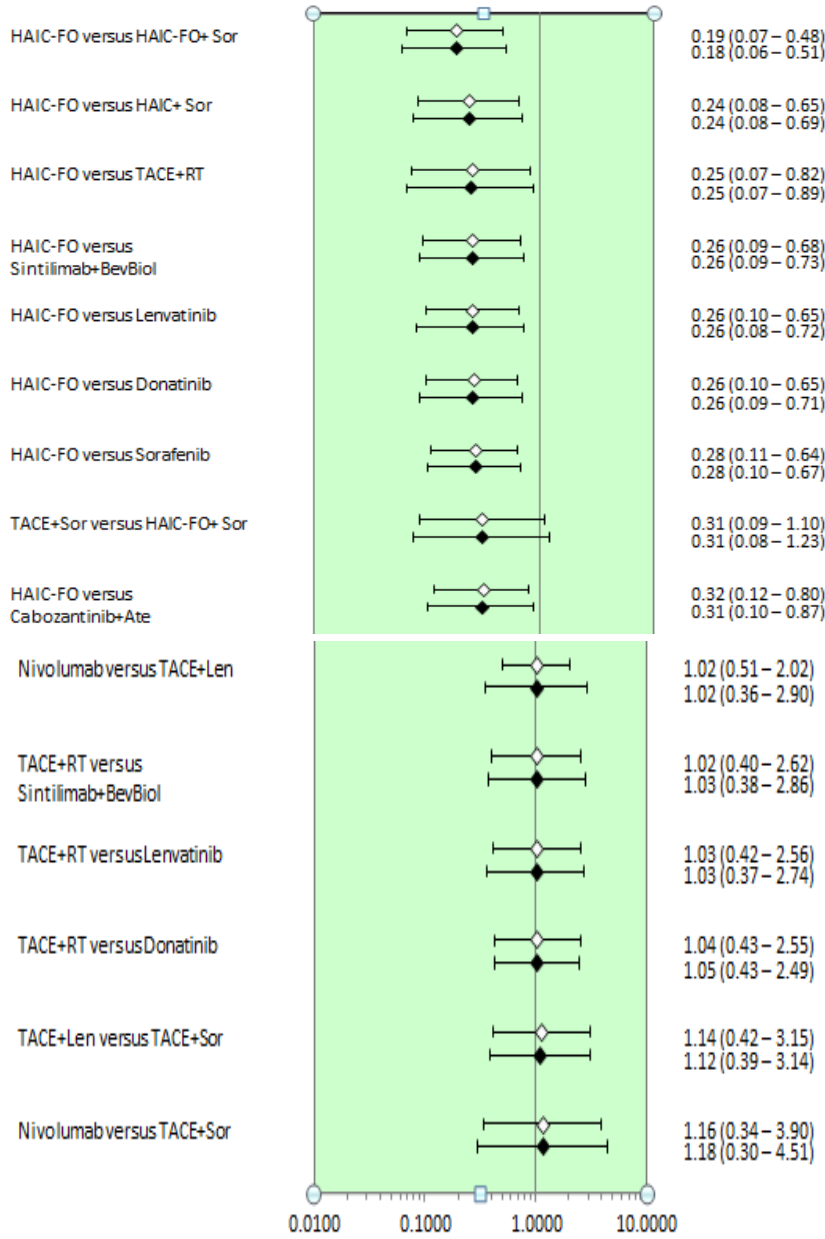

Heterogeneity (Inform.) = 0.1215  
95% CrI (0.04039 – 0.3397)

◊ Fixed Effects      ◆ Random Effects (Informative Prior)

**Treatment 1 vs. Treatment 2**

**O.R. (95% Cr.I.)**

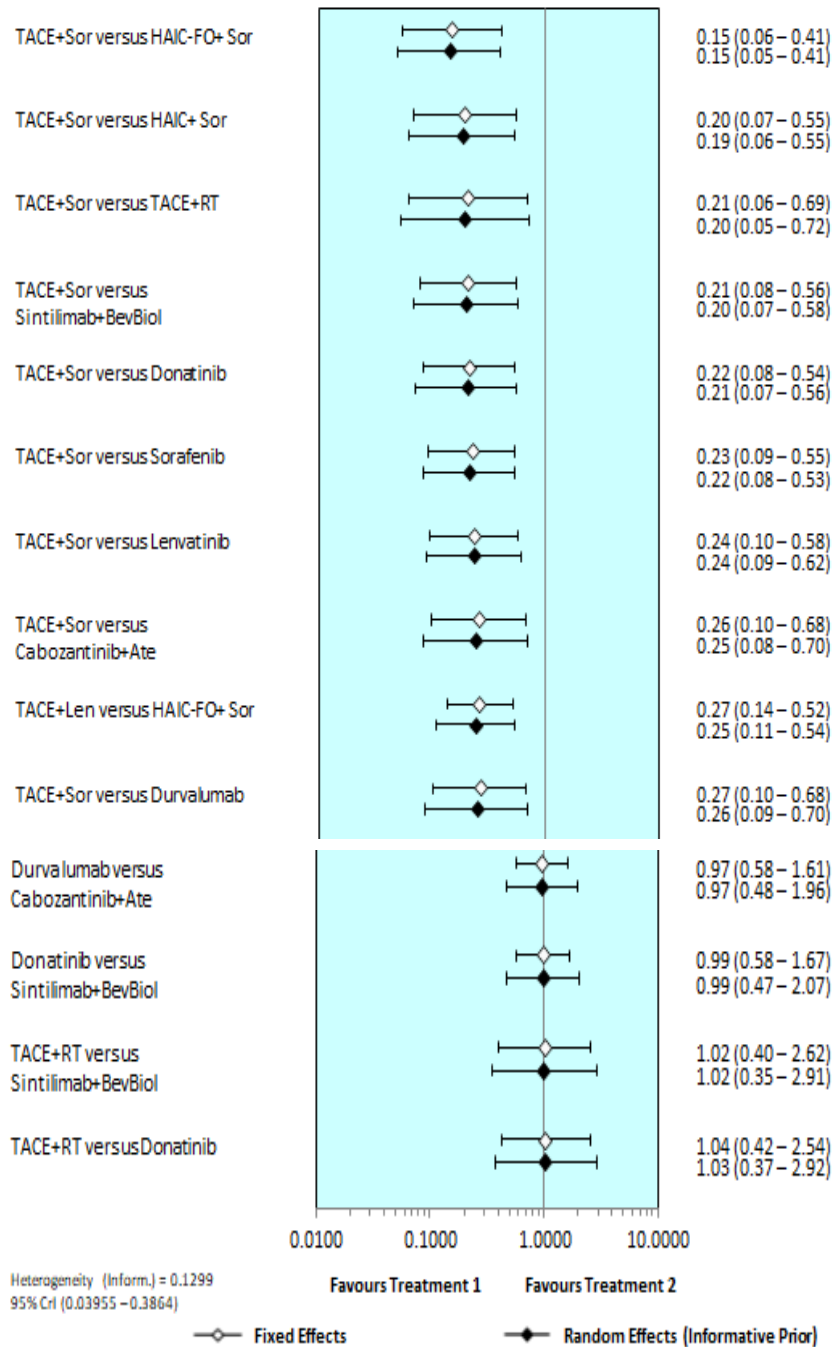

Supplementary Figure 10. Sensitivity analysis results in terms of forest plot including a study (A) without high risk bias, (B) with high risk bias. Both forest plot exhibited similar OR value and heterogeneity.
